# Supplementary material for: Association of Vision Impairment With Cognitive Decline Across Multiple Domains in Older Adults
Source: PubMed Central journal article supplement (PMC8285732; doi:10.1001/jamanetworkopen.2021.17416), 2021-07-16
Supplement: jamanetwopen-e2117416-s001.pdf [file jamanetwopen-e2117416-s001.pdf]

## Supplemental Online Content

Varadaraj V, Munoz B, Deal JA, et al. Association of vision impairment with cognitive decline across multiple domains in older adults. *JAMA Netw Open*. 2021;4(7):e2117416. doi:10.1001/jamanetworkopen.2021.17416

**eTable 1.** Distribution of Cognitive Test Scores in Each Domain at the Baseline Visit, Baltimore Longitudinal Study on Aging, 2003-2019

**eTable 2.** Standardized, Multivariable-Adjusted, Population-Average-Estimates and Difference in Estimates of Annual Rates of Domain-Specific Cognitive Decline by Baseline Visual Acuity and Contrast Sensitivity, Baltimore Longitudinal Study on Aging (2003-2019), N=1014 Participants (Excluding 188 Participants With Only a Baseline Visit)

**eTable 3.** Standardized, Multivariable-Adjusted, Population-Average-Estimates and Difference in Estimates of Annual Rates of Domain-Specific Cognitive Decline by Baseline Stere Acuity Impairment, Baltimore Longitudinal Study on Aging (2003-2019), N=1014 Participants (Excluding 188 Participants With Only a Baseline Visit)

**eTable 4.** Demographic and Clinical Characteristics of Participants at Baseline, Baltimore Longitudinal Study on Aging (2003-2019), by Inclusion in the Longitudinal Sensitivity Analysis

This supplemental material has been provided by the authors to give readers additional information about their work.

**eTable 1. Distribution of Cognitive Test Scores in Each Domain at the Baseline Visit, Baltimore Longitudinal Study on Aging, 2003-2019**

| <b>Cognitive Tests per Domain</b>         | <b>N</b> | <b>Mean (SD)</b> | <b>Median (IQR)</b> | <b>Min, Max</b> |
|-------------------------------------------|----------|------------------|---------------------|-----------------|
| <b>Language</b>                           |          |                  |                     |                 |
| Verbal Fluency-Categories*                | 1183     | 15.8 (3.5)       | 15.7 (13.3, 18.0)   | 5.0, 32.0       |
| Verbal Fluency-Letters*                   | 1185     | 14.3 (4.1)       | 14.3 (11.3, 17.0)   | 1.7, 29.3       |
| Boston Naming                             | 1156     | 54.2 (6.0)       | 56 (52, 58)         | 16, 60          |
| <b>Memory</b>                             |          |                  |                     |                 |
| CVLT: Immediate free recall*              | 1167     | 51.3 (12.0)      | 52 (42, 60)         | 17,80           |
| CVLT: Long-delayed free recall*           | 1154     | 10.7 (3.4)       | 11 (8, 14)          | 0,16            |
| <b>Attention</b>                          |          |                  |                     |                 |
| TMT Part A (log scale)                    | 1180     | 1.49 (0.15)      | 1.48 (1.40, 1.58)   | 0.70, 2.28      |
| WAIS-R Digit Span Forward*                | 1150     | 8.1 (2.3)        | 8 (6, 10)           | 2, 14           |
| <b>Executive Function</b>                 |          |                  |                     |                 |
| WAIS-R Digit Span Backward*               | 1147     | 7.0 (2.2)        | 7 (6, 8)            | 0, 14           |
| Delta TMT: Trail B – Trail A (in seconds) | 1156     | 52.5 (37.6)      | 43 (29, 63)         | -24, 275        |
| <b>Visuospatial Ability</b>               |          |                  |                     |                 |
| Clock-Drawing Test 3:25                   | 1035     | 8.6 (1.0)        | 9 (8, 9)            | 3,10            |
| Clock-Drawing Test 11:10                  | 1162     | 9.1 (1.1)        | 9 (8, 10)           | 4, 10           |
| Card Rotations test                       | 1146     | 82.9 (38.8)      | 79 (55, 107)        | -5, 204         |
| <b>Domains (Global scores)</b>            |          |                  |                     |                 |
| Language                                  | 1187     | 0.01 (0.74)      | 0.07 (-0.41, 0.49)  | -3.28, 2.51     |
| Memory                                    | 1167     | -0.02 (0.95)     | 0.00 (-0.70, 0.74)  | -2.69,1.93      |
| Attention                                 | 1200     | -0.01 (0.80)     | -0.03 (-0.50,0.54)  | -5.29, 3.48     |
| Executive function                        | 1197     | 0.00 (0.82)      | 0.07 (-0.42, 0.51)  | -5.77, 2.27     |
| Visuospatial ability                      | 1193     | -0.02 (0.87)     | -0.06 (-0.61,0.53)  | -2.82, 2.52     |

Abbreviations: CVLT= California Verbal Language Test, TMT= Trail Making Test, WAIS-R=Wechsler Adult Intelligence Scale—  
Revised

\*Non-visual cognitive task

**eTable 2. Standardized, Multivariable-Adjusted, Population-Average-Estimates and Difference in Estimates of Annual Rates of Domain-Specific Cognitive Decline by Baseline Visual Acuity and Contrast Sensitivity, Baltimore Longitudinal Study on Aging (2003-2019), N=1014 Participants (Excluding 188 Participants With Only a Baseline Visit)**

| Cognitive Domain     | Difference at baseline per 0.1 log unit worse visual acuity/contrast sensitivity | Annual rate of change for reference group (median visual acuity/contrast sensitivity at baseline) | Difference (acceleration) in annual rate of change in the slope per 0.1 log unit worse baseline visual acuity/contrast sensitivity |
|----------------------|----------------------------------------------------------------------------------|---------------------------------------------------------------------------------------------------|------------------------------------------------------------------------------------------------------------------------------------|
| Visual Acuity        |                                                                                  |                                                                                                   |                                                                                                                                    |
|                      | <i>β (95% CI)</i>                                                                | <i>β (95% CI)<sup>a</sup></i>                                                                     | <i>β (95% CI), p-value</i>                                                                                                         |
| Language             | <b>-0.045 (-0.073 to -0.017)</b>                                                 | <b>-0.040 (-0.045 to -0.035)</b>                                                                  | <b>-0.0042 (-0.007 to -0.001), 0.008</b>                                                                                           |
| Memory               | -0.024 (-0.059 to 0.010)                                                         | <b>-0.033 (-0.040 to -0.026)</b>                                                                  | <b>-0.0051 (-0.010 to -0.001), 0.02</b>                                                                                            |
| Attention            | <b>-0.049 (-0.077 to -0.021)</b>                                                 | <b>-0.066 (-0.074 to -0.058)</b>                                                                  | -0.0045 (-0.010 to 0.001), 0.09                                                                                                    |
| Executive function   | <b>-0.037 (-0.066 to -0.008)</b>                                                 | <b>-0.036 (-0.042 to -0.030)</b>                                                                  | <b>-0.0041 (-0.008 to -0.002), 0.04</b>                                                                                            |
| Visuospatial ability | <b>-0.074 (-0.107 to -0.041)</b>                                                 | <b>-0.049 (-0.058 to -0.041)</b>                                                                  | -0.001 (-0.006 to 0.0045), 0.74                                                                                                    |
| Contrast Sensitivity |                                                                                  |                                                                                                   |                                                                                                                                    |
| Language             | -0.017 (-0.056 to 0.021)                                                         | <b>-0.038 (-0.043 to -0.033)</b>                                                                  | <b>-0.010 (-0.015 to -0.006), &lt;0.001</b>                                                                                        |
| Memory               | -0.031 (-0.078 to 0.015)                                                         | <b>-0.032 (-0.039 to -0.025)</b>                                                                  | <b>-0.009 (-0.015 to -0.003), 0.003</b>                                                                                            |
| Attention            | -0.002 (-0.041 to 0.036)                                                         | <b>-0.065 (-0.073 to -0.057)</b>                                                                  | <b>-0.012 (-0.019 to -0.005), 0.001</b>                                                                                            |
| Executive function   | -0.017 (-0.056 to 0.023)                                                         | <b>-0.036 (-0.042 to -0.030)</b>                                                                  | <b>-0.006 (-0.012 to -0.0005), 0.03</b>                                                                                            |
| Visuospatial ability | <b>-0.053 (-0.098 to -0.009)</b>                                                 | <b>-0.046 (-0.054 to -0.037)</b>                                                                  | <b>-0.010 (-0.018 to -0.003), 0.007</b>                                                                                            |

All models adjusted for baseline visual acuity/contrast sensitivity, age, sex, race, education, smoking status, hypertension, and diabetes

<sup>a</sup> For a participant with 0.1 logMar (median at baseline) in visual acuity models, and for a participant with 1.95 log contrast (median at baseline) for contrast sensitivity models

Bold: P<0.05

**eTable 3. Standardized, Multivariable-Adjusted, Population-Average-Estimates and Difference in Estimates of Annual Rates of Domain-Specific Cognitive Decline by Baseline Stereo Acuity Impairment, Baltimore Longitudinal Study on Aging (2003-2019), N=1014 Participants (Excluding 188 Participants With Only a Baseline Visit)**

| Cognitive Domain     | Difference at baseline between the stereo acuity non-impaired and impaired | Annual rate of change for reference group (no stereoacuity impairment at baseline) | Difference (acceleration) in annual rate of change in the slope for group with stereoacuity impairment at baseline |
|----------------------|----------------------------------------------------------------------------|------------------------------------------------------------------------------------|--------------------------------------------------------------------------------------------------------------------|
|                      | $\beta$ (95% CI)                                                           | $\beta$ (95% CI)                                                                   | $\beta$ (95% CI)                                                                                                   |
| Language             | -0.023 (-0.147 to 0.102)                                                   | <b>-0.040 (-0.045 to -0.034)</b>                                                   | <b>-0.020 (-0.034 to -0.005), 0.007</b>                                                                            |
| Memory               | -0.028 (-0.179 to 0.124)                                                   | <b>-0.029 (-0.036 to -0.022)</b>                                                   | <b>-0.032 (-0.052 to -0.013), 0.001</b>                                                                            |
| Attention            | -0.065 (-0.191 to 0.061)                                                   | <b>-0.065 (-0.074 to -0.057)</b>                                                   | -0.014 (-0.037 to 0.009), 0.23                                                                                     |
| Executive function   | <b>-0.147 (-0.273 to -0.021)</b>                                           | <b>-0.037 (-0.043 to -0.030)</b>                                                   | -0.005 (-0.022 to 0.011), 0.52                                                                                     |
| Visuospatial ability | -0.062 (-0.204 to 0.080)                                                   | <b>-0.046 (-0.055 to -0.037)</b>                                                   | -0.022 (-0.046 to 0.002), 0.07                                                                                     |

All models adjusted for baseline stereo impairment status, age, sex, race, education, smoking status, hypertension, and diabetes  
 Bold: P<0.05

**eTable 4. Demographic and Clinical Characteristics of Participants at Baseline, Baltimore Longitudinal Study on Aging (2003-2019), by Inclusion in the Longitudinal Sensitivity Analysis**

| <b>Demographics</b>                                                 | <b>Only baseline visit<br/>N=188</b> | <b>Two or more visits<br/>N=1014</b> | <b>p-value<sup>a</sup></b>               |
|---------------------------------------------------------------------|--------------------------------------|--------------------------------------|------------------------------------------|
| Age, in years, mean (SD) [range]                                    | 69.8 (8.4) [60-94]                   | 71.3 (8.6) [60-93]                   | <b>0.026</b>                             |
| Age categories, in years, N (%)                                     |                                      |                                      |                                          |
| 60-79                                                               | 157 (83.5)                           | 788 (77.7)                           | 0.07                                     |
| ≥80                                                                 | 31 (16.5)                            | 226 (22.3)                           |                                          |
| Sex, N (%)                                                          |                                      |                                      |                                          |
| Female                                                              | 89 (47.3)                            | 521 (51.4)                           | 0.31                                     |
| Male                                                                | 99 (52.7)                            | 493 (48.6)                           |                                          |
| Race, N (%)                                                         |                                      |                                      |                                          |
| White                                                               | 130 (69.1)                           | 723 (71.3)                           | 0.83                                     |
| Black                                                               | 47 (25.0)                            | 234 (23.1)                           |                                          |
| Other                                                               | 11 (5.9)                             | 57 (5.6)                             |                                          |
| Education, N (%)                                                    |                                      |                                      |                                          |
| High school or less                                                 | 11 (5.9)                             | 58 (5.7)                             | 0.94                                     |
| At least some college, completed college                            | 60 (31.9)                            | 312 (30.8)                           |                                          |
| Graduate school                                                     | 117 (62.2)                           | 644 (63.5)                           |                                          |
| Number of visits, mean (SD)                                         | NA                                   | 5.0 (2.4)                            | NA                                       |
| Follow-up time, in years, mean (SD)                                 | NA                                   | 8.1 (4.0)                            | NA                                       |
| Number of visits, N (%)                                             |                                      |                                      |                                          |
| Two visits                                                          | NA                                   | 160 (15.8)                           | NA                                       |
| ≥Three visits                                                       | NA                                   | 854 (84.2)                           |                                          |
| <b>Health Measures</b>                                              |                                      |                                      |                                          |
| Smoking, N (%)                                                      |                                      |                                      |                                          |
| Never/Quit >10 years ago                                            | 177 (95.2)                           | 975 (96.3)                           | 0.48                                     |
| Current/Quit <10 years                                              | 9 (4.8)                              | 38 (3.7)                             |                                          |
| Body Mass Index, in kg/m <sup>2</sup> , N (%)                       |                                      |                                      |                                          |
| <25                                                                 | 56 (29.9)                            | 375 (37.0)                           | <b>0.03<br/>(test<br/>for<br/>trend)</b> |
| 25 to <30                                                           | 77 (41.2)                            | 409 (40.3)                           |                                          |
| ≥30                                                                 | 54 (28.9)                            | 230 (22.7)                           |                                          |
| Diabetes, N (%)                                                     | 47 (25.0)                            | 189 (18.6)                           | <b>0.04</b>                              |
| Hypertension, N (%)                                                 | 80 (42.6)                            | 361 (35.6)                           | 0.07                                     |
| <b>Visual Measures</b>                                              |                                      |                                      |                                          |
| Visual Acuity (logMAR), mean (SD)                                   | 0.16 (0.16)                          | 0.16 (0.16)                          | 0.96                                     |
| Contrast Sensitivity <sup>b</sup> (log units), mean (SD)            | 1.91 (0.12)                          | 1.91 (0.12)                          | 0.89                                     |
| Stereo Acuity Impairment (worse than 60 arcsec), N (%) <sup>c</sup> | 25 (13.7)                            | 136 (14.0)                           | 0.91                                     |
| Any Vision Impairment, N (%) <sup>d</sup>                           | 53 (28.5)                            | 268 (27.2)                           | 0.71                                     |
| <b>Cognitive Domain Scores</b>                                      |                                      |                                      |                                          |
| Language, mean (SD)                                                 | -0.020 (0.763)                       | 0.019 (0.732)                        | 0.50                                     |
| Memory, mean (SD)                                                   | -0.186 (0.981)                       | 0.014 (0.939)                        | <b>0.009</b>                             |
| Attention, mean (SD)                                                | -0.080 (0.932)                       | 0.003 (0.774)                        | 0.25                                     |
| Executive function, mean (SD)                                       | -0.043 (0.929)                       | 0.015 (0.801)                        | 0.42                                     |
| Visuospatial ability, mean (SD)                                     | -0.132 (0.890)                       | -0.004 (0.864)                       | 0.066                                    |

Abbreviations: logMAR=Logarithm of the Minimum Angle of Resolution, SD=standard deviation

<sup>a</sup>For P values, chi-squared test, test for trend, or t test was used as appropriate.

<sup>b</sup>Missing for 3 (only baseline) and 20 (two or more visits)

<sup>c</sup>Missing for 5 (only baseline) and 40 (two or more visits)

<sup>d</sup>Either visual acuity, contrast sensitivity, or stereo acuity impairment; missing for 2 (only baseline) and 28 (2 or more visits)
